# Supplementary material
Source: PubMed Central journal article supplement (PMC7594376)

### **Supplementary Table 1**

Details of the antibodies used for flow cytometry and immunoblotting.

### **Supplementary Figure 1**

(A) Dose responses for IBL-202 and venetoclax in combination at a ratio of 1 : 100 against primary CLL cells co-cultured with CD40L-expressing fibroblasts (n = 10).

(B) Combination index (CI) plot (left) and isobologram (right) for IBL-202 and venetoclax in combination indicating synergy between the drugs against CLL patient samples (n = 6) when in co-culture with HS-5 stromal cells (n = 6). CI values < 1 are indicative of synergy. The data are presented as the CI over a range of fractional effects where a Fe value of 0.5, for example, is indicative of a 50% cell kill.

(C) Histogram showing the Bax/Bcl-2 expression ratio in CLL patient samples (n = 6) following treatment with IBL-202 and venetoclax, alone and in combination.

(D) Dose response of wild-type (WT) and pre-doxycycline treated, Cas9 / *TP53*-targeted guide RNA OSU-CLL cells (Cas9 + gRNA) treated with IBL-202 alone, or in combination with venetoclax. Cell viability was assessed by flow cytometry and DiIC<sub>1</sub>(5)/PI following a 48-h treatment. Doses of IBL-202 are indicated on the X-axis. Venetoclax and IBL-202 were combined at a ratio of 1 : 5.

(E) Electropherogram illustrating sequencing results of the *TP53* genetic region from wild-type and *TP53*ko OSU-CLL lines. Western blotting for p53 protein expression in WT and *TP53*ko OSU-CLL cells with and without treatment with etoposide (50  $\mu$ M, 6 h), indicating that induction of DNA strand breaks upregulates p53 expression in WT but not *TP53*ko OSU-CLL cells.

### **Supplementary Figure 2**

Changes in the expression of the proteins indicated following treatment with IBL-202 and venetoclax, alone or in combination for 6h, were examined in CLL patient samples (n = 5) co-cultured with CD40L-fibroblasts. The first lane in each panel is an untreated control of CLL cells cultured in medium alone with no drug treatment. The values shown under each lane indicate the fold change in expression relative to the untreated control for each patient.

**Supplementary Table 1. antibody information**

| <b>Antibody</b> | <b>Clone</b> | <b>Catalogue #</b> | <b>Manufacturer</b> | <b>Phosphorylation site</b> |
|-----------------|--------------|--------------------|---------------------|-----------------------------|
| phospho-AKT     | D9E          | 4060               | CST                 | Ser473                      |
| AKT             | C67E7        | 4691               | CST                 |                             |
| phospho-NFκB    | 93H1         | 3033               | CST                 | Ser536                      |
| NFκB            | L8F6         | 6956               | CST                 |                             |
| phospho-Bad     | 40A9         | 5284               | CST                 | Ser112                      |
| Bad             | D24A9        | 9239               | CST                 |                             |
| Bcl-xL          | 54H6         | 2764               | CST                 |                             |
| Mcl-1           | D2W9E        | 94296              | CST                 |                             |
| Noxa            | D8L7U        | 14766              | CST                 |                             |
| Bcl-2           | D55G8        | 4223               | CST                 |                             |
| Bax             | D2E11        | 5023               | CST                 |                             |
| c-Myc           | D84C12       | 5605               | CST                 |                             |
| Cleaved PARP    | Asp214       | 9541               | CST                 |                             |
| β-actin         | AC-74        | A5316              | Sigma-Aldrich       |                             |
| PE-CD49d        | 9F10         | 304304             | BioLegend           |                             |
| PE-CXCR4(CD184) | 12G5         | 306506             | BioLegend           |                             |
| FITC-CD5        | UCHT2        | 300606             | BioLegend           |                             |
| APC-CD19        | HIB19        | 302212             | BioLegend           |                             |

Supplementary Figure 1.

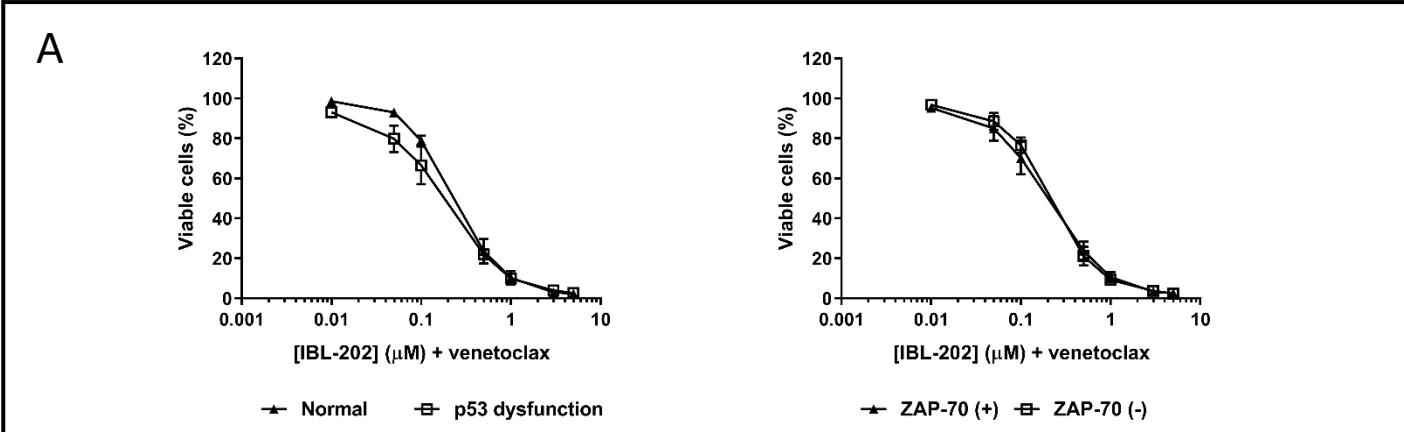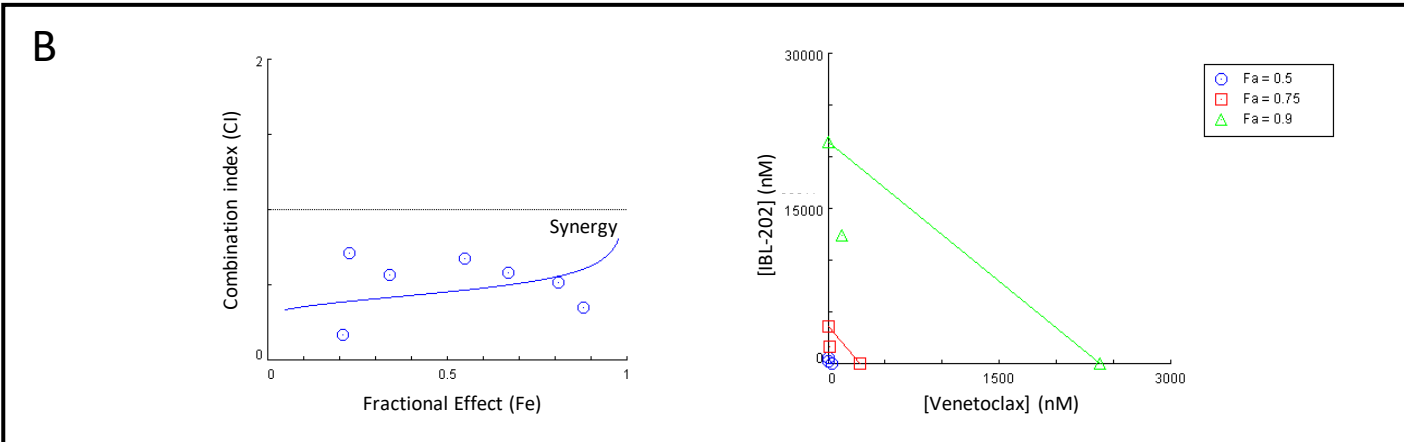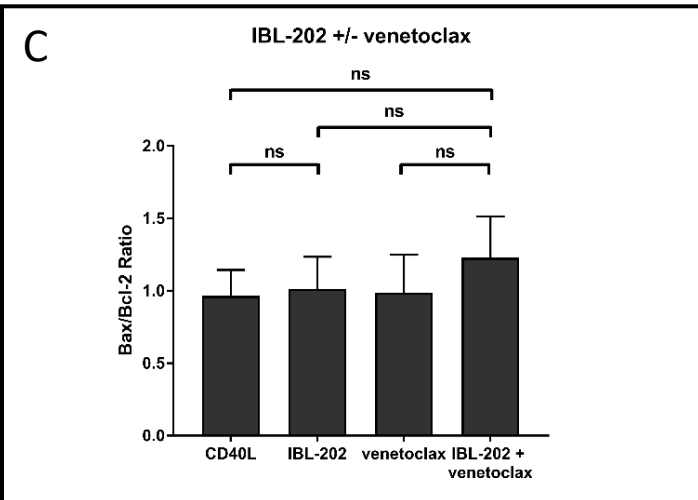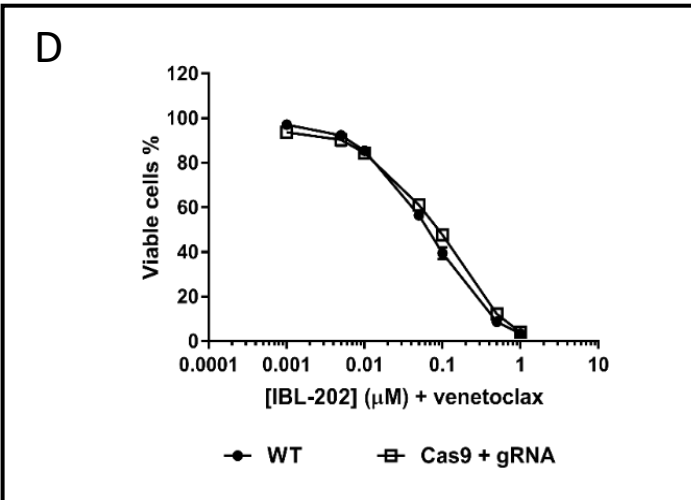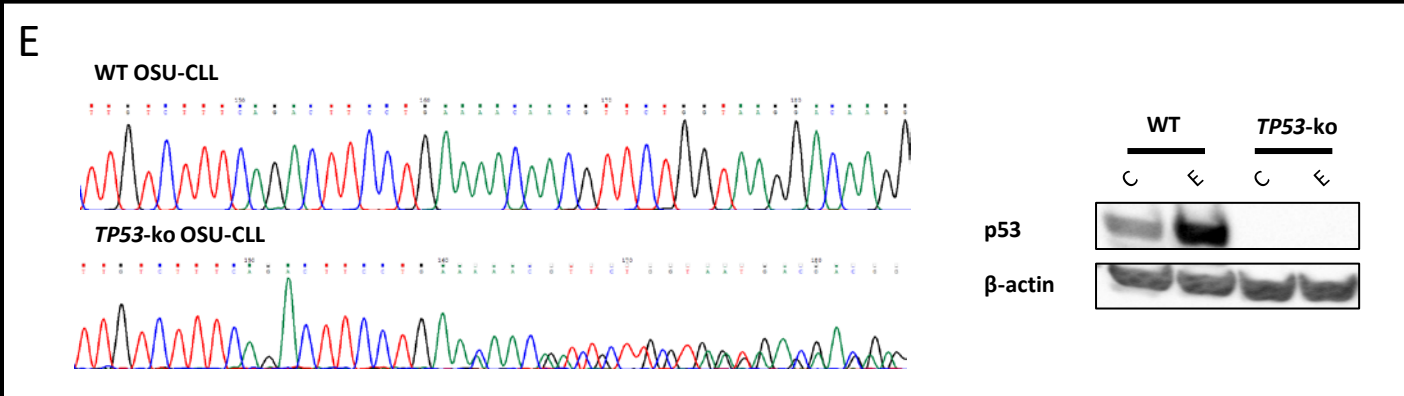

# Supplementary Figure 2.

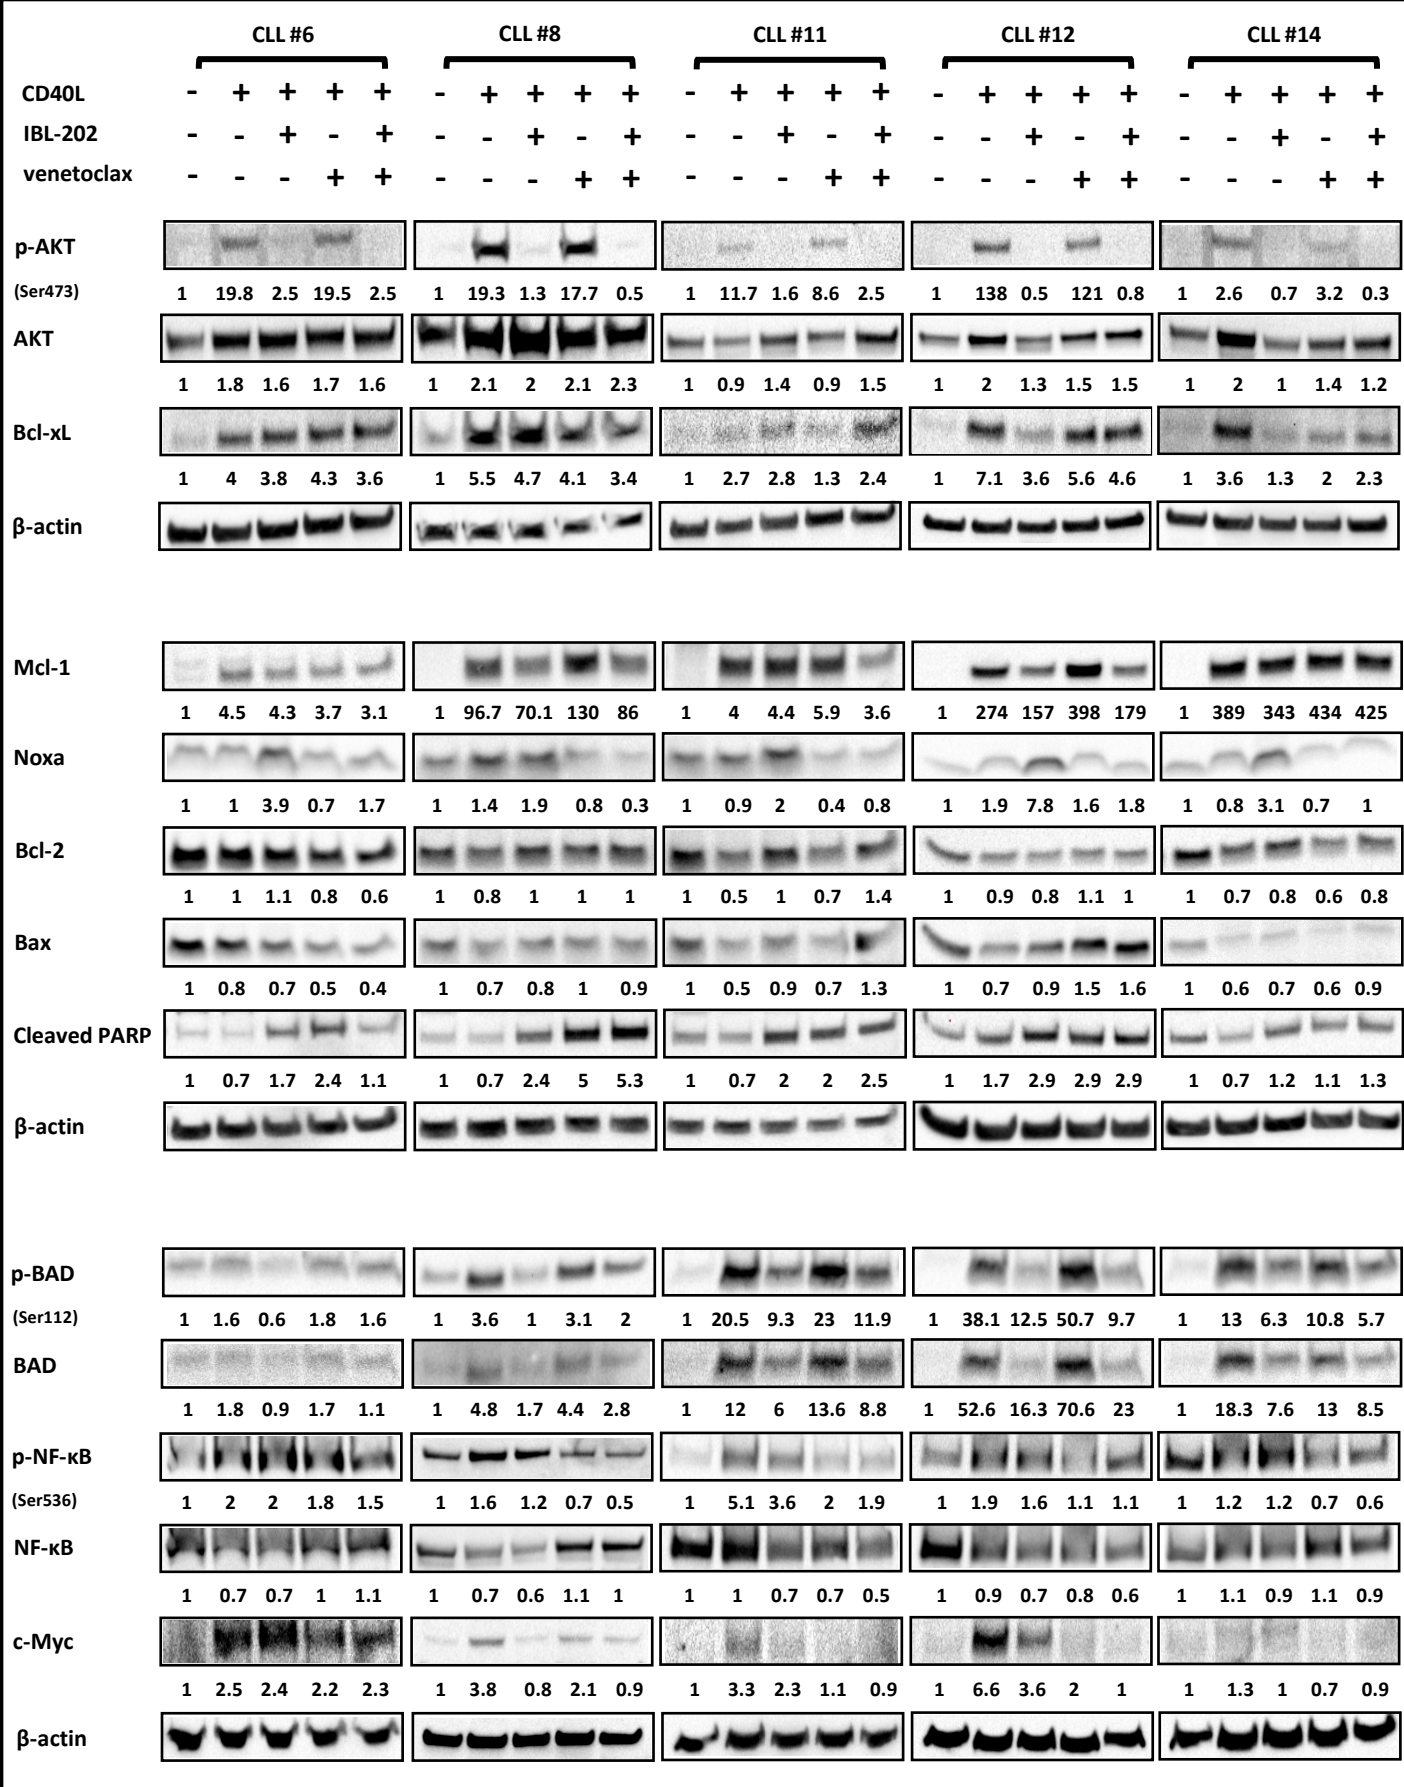

Supplement: advancesADV2019001369-suppl1.pdf [file advancesADV2019001369-suppl1.pdf]
